# Supplementary material for: Design of SnO2/C hybrid triple-layer nanospheres as Li-ion battery anodes with high stability and rate capability
Source: Royal Society of Chemistry journal article supplement (doi:10.1039/c4ta05434b), 2014-12-12
Supplement: c4ta05434b1.pdf [file c4ta05434b1.pdf]

## Supporting Information

### Design of SnO<sub>2</sub>/C Hybrid Triple-layer Nanospheres as Li-Ion Battery

#### Anodes with High Stability and Rate Capability

Hao Hu, Haoyan Cheng, Guojian Li, Jinping Liu and Ying Yu\*

Institute of Nanoscience and Nanotechnology, College of Physical Science and

Technology, Central China Normal University, Wuhan 430079, P.R. China

\* Corresponding author. Tel: 86-27-67867037; Email: [yuying01@mail.ccnu.edu.cn](mailto:yuying01@mail.ccnu.edu.cn)

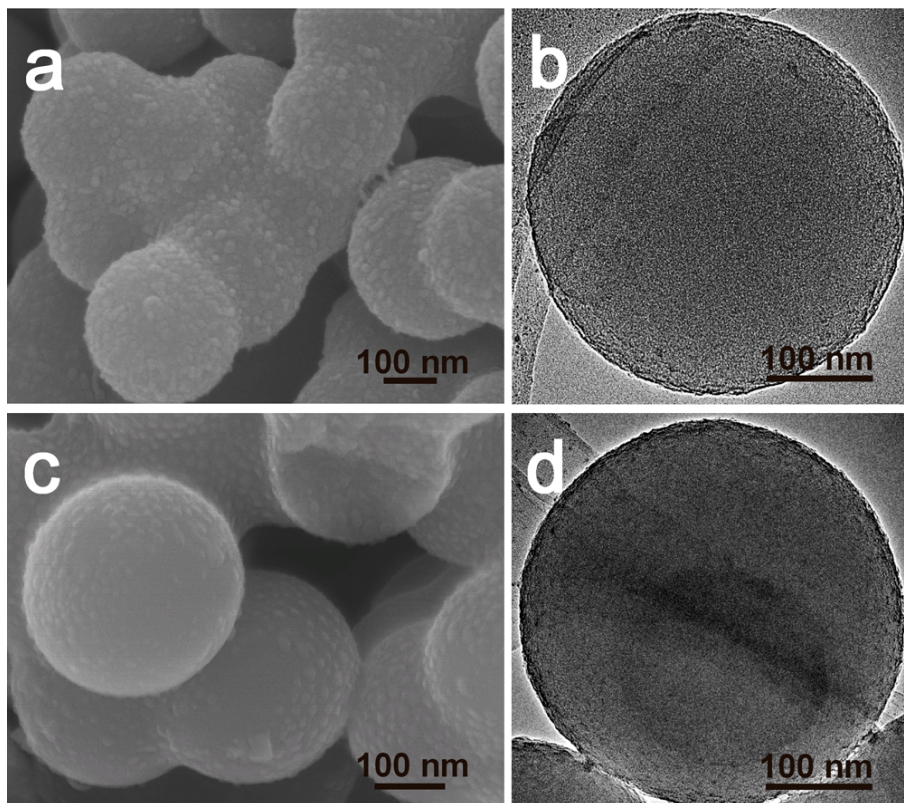

**Fig. S1** SEM and TEM images for SnO<sub>2</sub>/C nanospheres synthesized in only deionized water (a, b), and in mixture solution of ethanol and water (c, d) respectively after ultrasonic treatment for 1.5 h.

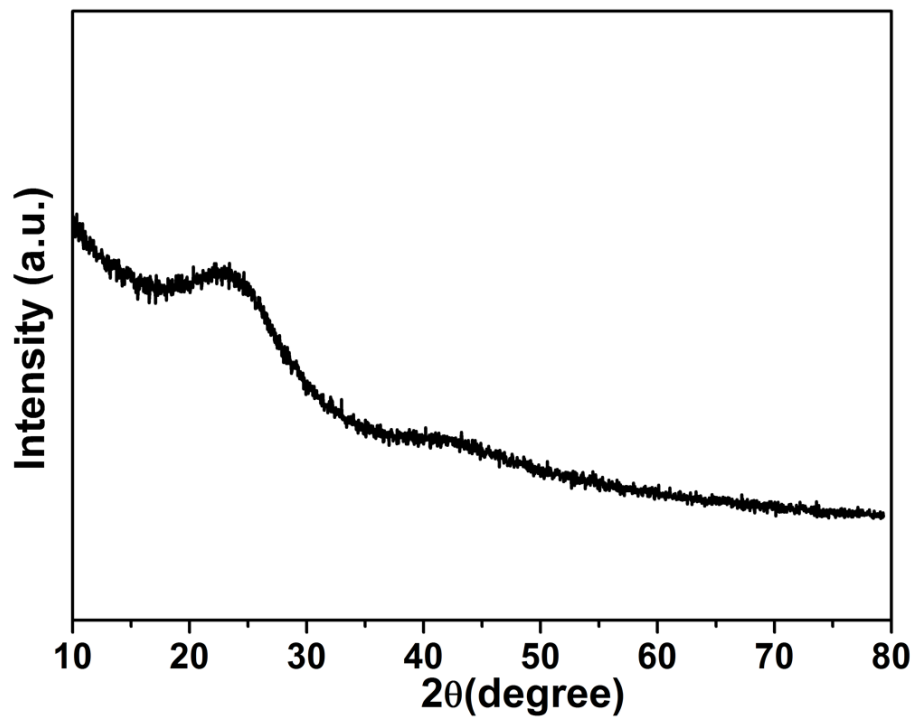

**Fig. S2** XRD pattern of carbonized colloidal carbon spheres (CCs).

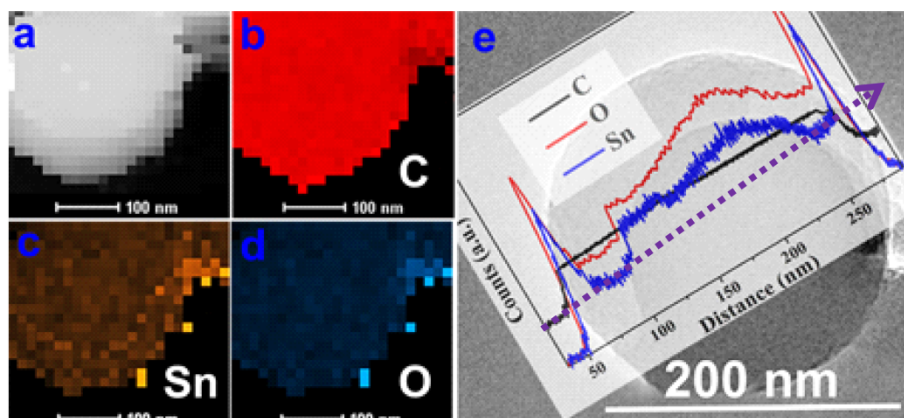

**Fig. S3** DF-STEM images of SnO<sub>2</sub>/C hybrid triple-layer nanospheres (STN) (a) and elemental mapping images for STN of carbon (b), tin (c) and oxygen (d) by energy-dispersive X-ray spectroscopy (EDX). And EDX profiles for C, O and Sn along purple dotted arrow across STN (e).

These images were collected with an instrument of Titan G2 60-300 (Netherland).

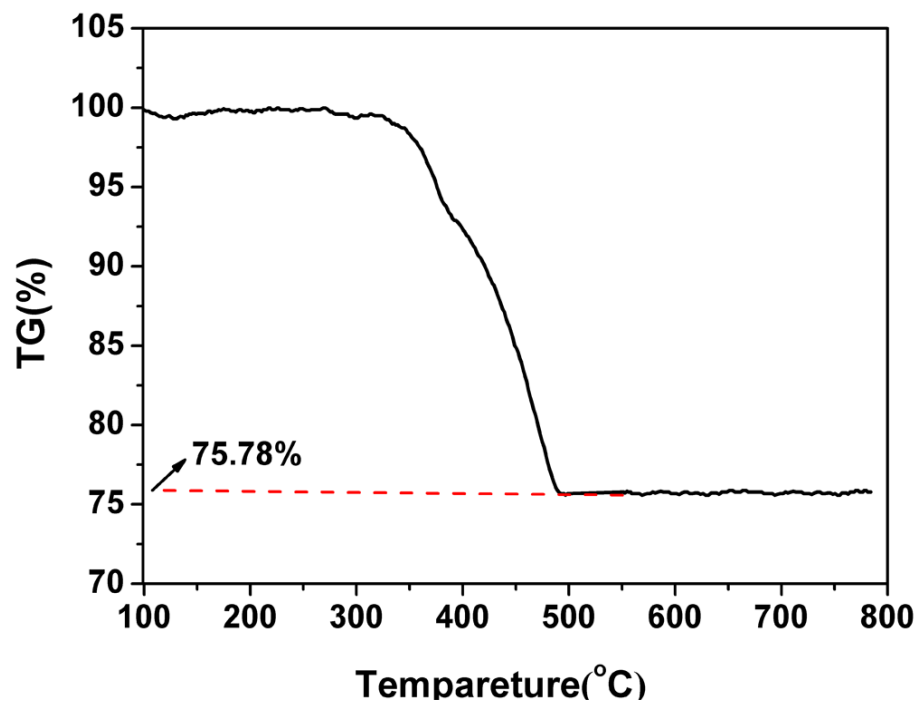

Fig. S4 TGA curve of SnO<sub>2</sub>/C hybrid triple-layer nanospheres (STN).

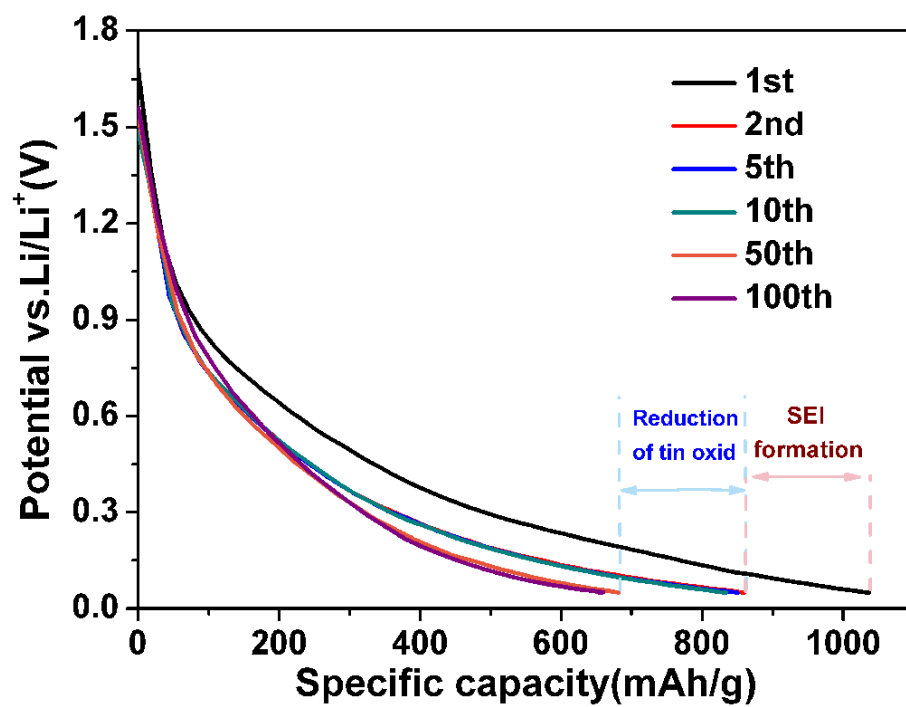

Fig. S5 Discharge voltage profiles of STN for 1<sup>st</sup>, 2<sup>nd</sup>, 5<sup>th</sup>, 10<sup>th</sup>, 50<sup>th</sup> and 100<sup>th</sup> cycles at current density of 300 mA/g with a voltage window of 0.05 ~2.5 V.

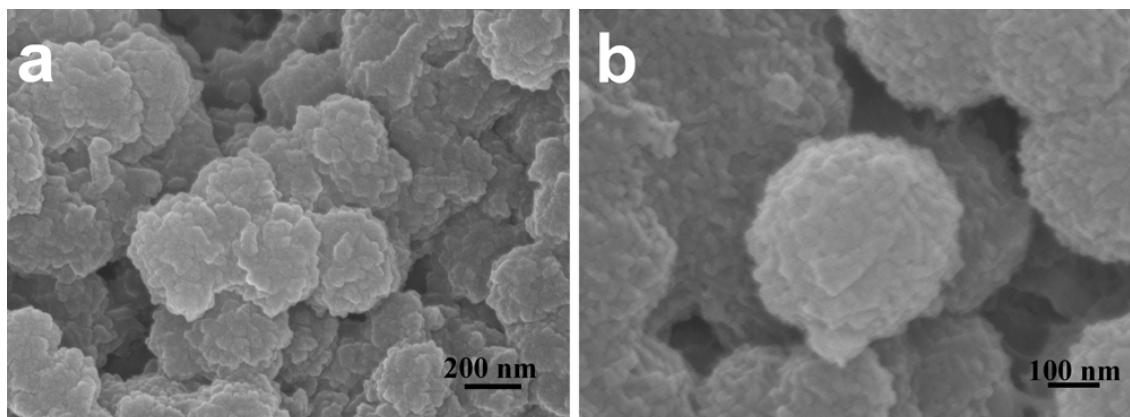

**Fig. S6** SEM images of STN electrodes after 350<sup>th</sup> cycle at 300 mA/g (a), after 1000<sup>th</sup> cycle at 20 C (b).

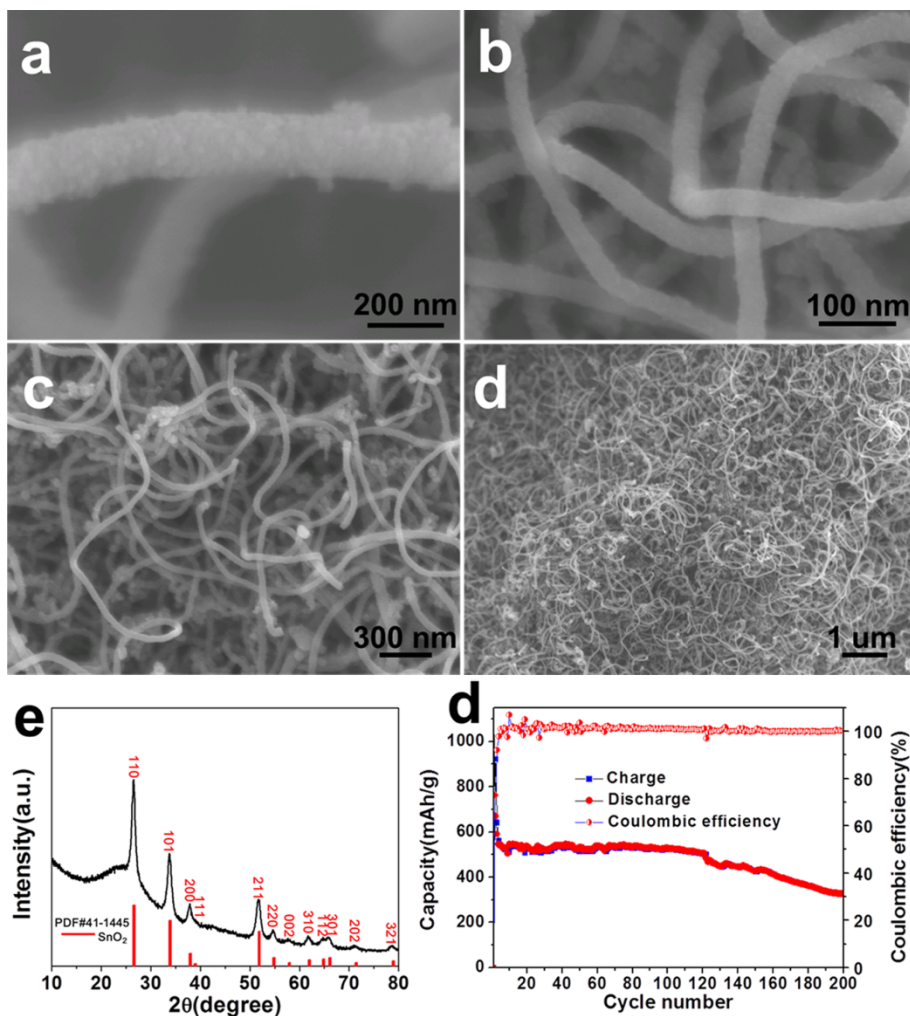

**Fig. S7** SEM images of raw SnO<sub>2</sub>@CNT (carbon nanotubes) with different magnifications (a), (b), (c) and (d), XRD pattern of raw SnO<sub>2</sub>@CNT (e), and cycling performance of SnO<sub>2</sub>@CNT at a current density of 300 mA/g within a voltage window of 0.05~2.5 V (f). For comparison, the composite of SnO<sub>2</sub>@CNT was prepared. The process is as follow. 0.1 g CNT in 80 ml (water/ethanol = 1:3, v: v) 0.5 M SnCl<sub>2</sub> solution and then stirring at 50 °C in a water bath for 8h. The as-prepared products were collected after several rinse-centrifugation cycles. The annealing of raw of SnO<sub>2</sub>@CNT was first carried out at 500 °C for 3h in argon atmosphere with heating rate of 15 °C/min, and then in air at 250 °C for 1.5h with the rate of 5 °C/min.



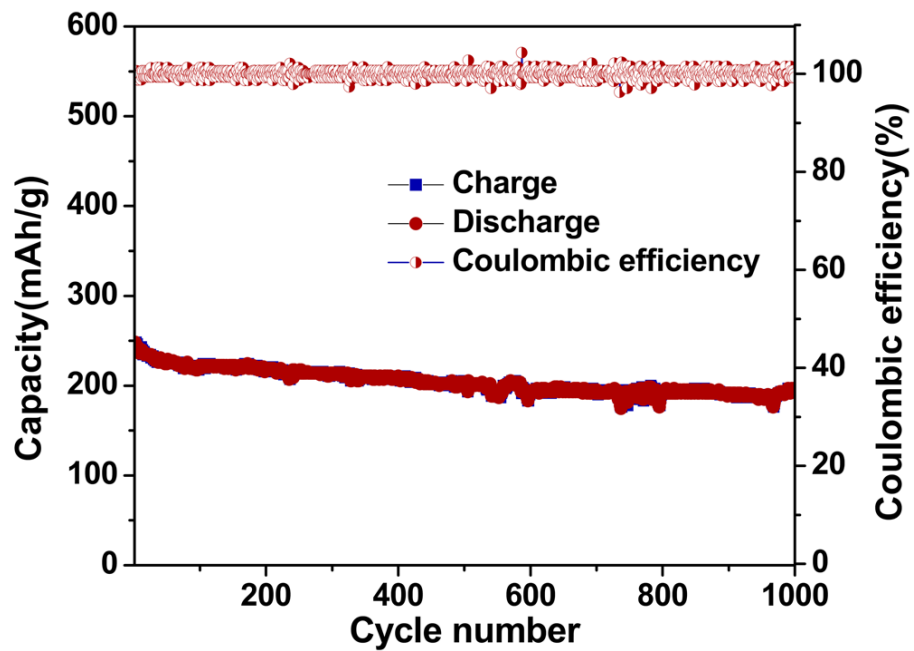

**Fig. S8** Cycling performance of STN at a current rate of 20 C ( $C = 690 \text{ mA/g}$ ) within a voltage window of 0.05~2.5 V.

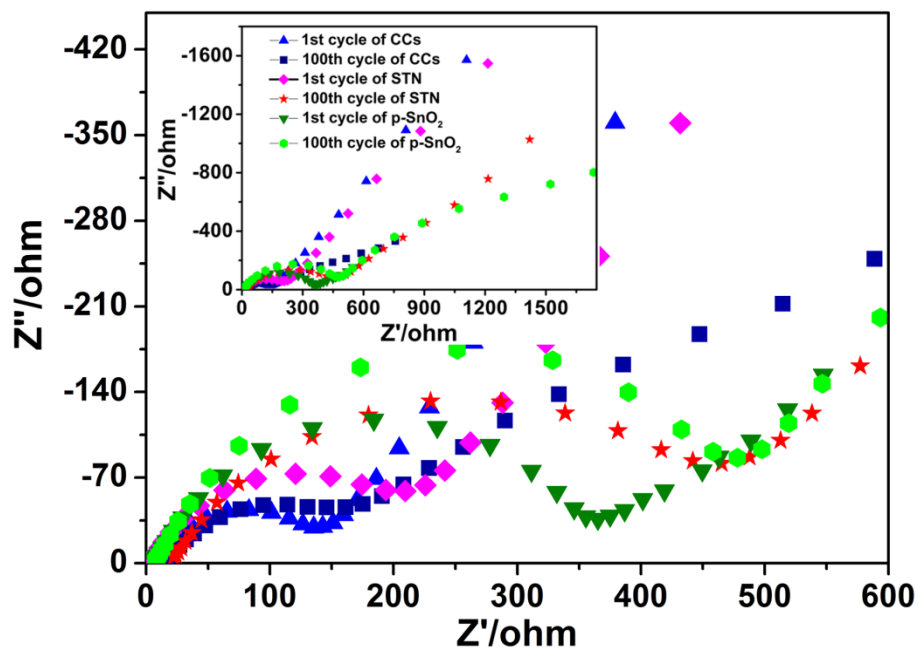

**Fig. S9** Nyquist plots of CCs, STN and p-SnO<sub>2</sub> electrodes at first and 100<sup>th</sup> charge/discharge cycles with an amplitude of 5.0 mV in the frequency range from 100 kHz to 10 mHz. The inset exhibits amplified spectra within high frequency region.

**Table S1.** Summary of the discharge performance (irreversible and reversible capacity) for variously typical SnO<sub>2</sub>-based anodes. (The irreversible capacities are resulted from irreversible cycling of reduction of tin oxide.)

| <b>Structure</b>                                    | <b>Current density (voltage window)</b> | <b>Cycling number</b>     | <b>Irreversible cycling number (irreversible capacity percentage)</b> | <b>Reversible capacity (mAh/g)</b> | <b>Ref.</b> |
|-----------------------------------------------------|-----------------------------------------|---------------------------|-----------------------------------------------------------------------|------------------------------------|-------------|
| SnO <sub>2</sub> /C hybrid triple-layer nanospheres | 300 mA/g<br>(0.05-2.5 V)                | 350                       | 80<br>(19%)                                                           | 653                                | Our work    |
|                                                     | 20 C (C=690 mA/g) (0.05-2.5 V)          | 1000 (after rate cycling) | –                                                                     | 260                                |             |
| SnO <sub>2</sub> @CNT                               | 300 mA/g<br>(0.05-2.5 V)                | 200                       | 5<br>(35%)                                                            | 325                                | Our work    |
| Ultrasmall SnO <sub>2</sub> in carbon               | 1400 mA/g<br>(0.01-1.5 V)               | 2000                      | 30<br>(44%)                                                           | 443                                | 1           |
| CNTs@SnO <sub>2</sub> @Carbon coaxial               | 400 mA/g<br>(0.01-2.5 V)                | 60                        | 20<br>(35%)                                                           | 505                                | 2           |

|                                         |                           |     |              |     |   |
|-----------------------------------------|---------------------------|-----|--------------|-----|---|
| nanocables                              |                           |     |              |     |   |
| SnO <sub>2</sub> @carbon<br>nanocluster | 100 mA/g<br>(0.01-2.5 V)  | 200 | 10<br>(~25%) | 852 | 3 |
| SnO <sub>2</sub> nanoboxes              | ~150 mA/g<br>(0.01-2.0 V) | 40  | 15<br>(~45%) | 570 | 4 |
| SnO <sub>2</sub> /graphene              | 400 mA/g<br>(0.01-2.0 V)  | 50  | 6<br>(~26%)  | 590 | 5 |

References:

- 1 A. Jahel, C. M. Ghimbeu, L. Monconduit, C. Vix-Guterl, *Adv. Energy Mater.*, 2014, **4**, 1400025.
- 2 S. Ding, J. S. Chen, X. W. Lou, *Chem. Asian J.*, 2011, **6**, 2278.
- 3 M. He, L. Yuan, X. Hu, W. Zhang, J. Shu, Y. Huang, *Nanoscale*, 2013, **5**, 3298.
- 4 Z. Y. Wang, D. Y. Luan, F. Y. C. Boey, X. W. Lou, *J. Am. Chem. Soc.*, 2011, **133**, 4738.
- 5 X. Wang, X. Zhou, K. Yao, J. Zhang, Z. Liu, *Carbon*, 2011, **49**, 133.
